# Supplementary material for: A Field Collection of Indigenous Grapevines as a Valuable Repository for Applied Research
Source: MDPI journal article supplement (doi:10.3390/plants11192563), 2022-09-28
Supplement: s1 [file s1]

**Supplementary Table S1:** Phenolics monomers and proanthocyanidin composition of indigenous black grape varieties. All values are in mg g<sup>-1</sup> FW (n = 3). Abbreviations are EGC – epigallocatechin; EC – epicatechin; ECG - epicatechin gallate; quer – quercetin; delph-3-gluc - delphinidin-3-*O*-glucoside; cya-3-gluc - cyanidin-3-*O*-glucoside; pet-3-gluc - petunidin-3-*O*-glucoside; peo-3-gluc - peonidin-3-*O*-glucoside; mal-3-gluc - malvidin-3-*O*-glucoside; delph-3-acetylgluc - delphinidin-3-*O*-acetylglucoside; pet-3-acetylgluc - petunidin-3-*O*-acetylglucoside; peo-3-acetylgluc - peonidin-3-*O*-acetylglucoside; mal-3-acetylgluc - malvidin-3-*O*-acetylglucoside; delph-3-*p*-coumgluc - delphinidin-3-*O*-(6-*p*-coumaroyl) glucoside; pet-3-*p*-coumgluc - petunidin-3-*O*-(6-*p*-coumaroyl) glucoside; peo-3-*p*-coumgluc - peonidin-3-*O*-(6-*p*-coumaroyl) glucoside; mal-3-*p*-coumgluc - malvidin-3-*O*-(6-*p*-coumaroyl) glucoside.

| Compounds           | Yael         | Rimon        | Black Sorek  | Black Tzuriman | Gilboa       | Baluti       | Tofachi      | Nitzan 1     | Ein Misla    | Tzuba Black  | Marawani     | Bituni Aruv  | Karkeshani   | Sable        |
|---------------------|--------------|--------------|--------------|----------------|--------------|--------------|--------------|--------------|--------------|--------------|--------------|--------------|--------------|--------------|
| Gallic acid         | 0.0001±0     | 0.0006±0     | 0.0009±0     | 0.0019±0       | 0.0015±0     | 0.0018±0.001 | 0.0004±0     | 0.0003±0     | 0.0005±0     | 0.0009±0     | 0.0013±0.001 | 0±0          | 0±0          | 0±0          |
| EGC                 | 0.0153±0.002 | 0.0106±0.001 | 0.0254±0     | 0.0075±0.001   | 0.0232±0.001 | 0.0425±0.002 | 0.0083±0.001 | 0.0087±0.001 | 0.0099±0     | 0.0121±0     | 0.0211±0.002 | 0.0205±0     | 0.008±0      | 0.031±0.002  |
| Catechin            | 0.0096±0     | 0.0152±0.002 | 0.0127±0.002 | 0.0503±0.01    | 0.0344±0.006 | 0.02±0.001   | 0.0162±0.001 | 0.0101±0.001 | 0.0363±0.008 | 0.0222±0.002 | 0.024±0.001  | 0.0149±0.001 | 0.0068±0.001 | 0.009±0.001  |
| EC                  | 0.0057±0.001 | 0.0044±0.001 | 0.0027±0.001 | 0.0023±0.001   | 0.0215±0.001 | 0.0136±0.001 | 0.0209±0     | 0.013±0.001  | 0.0115±0.001 | 0.0304±0.003 | 0±0          | 0±0          | 0±0          | 0.044±0.001  |
| ECG                 | 0.0045±0.002 | 0.0006±0     | 0.0024±0     | 0.0107±0.005   | 0.0016±0     | 0.0007±0     | 0.0021±0     | 0±0          | 0.0011±0.001 | 0.0015±0     | 0.0012±0     | 0±0          | 0±0          | 0±0          |
| Polymeric phenol    | 0.5353±0.037 | 1.0016±0.043 | 0.7532±0.003 | 1.1987±0.116   | 1.6095±0.075 | 1.1594±0.06  | 0.5347±0.004 | 0.4417±0.025 | 1.0846±0.202 | 0.8697±0.028 | 1.4821±0.027 | 0.5868±0.054 | 0.3908±0.006 | 0.85±0.051   |
| Caftaric acid       | 0.1594±0.002 | 0.1487±0.004 | 0.0769±0.003 | 0.1207±0.003   | 0.2341±0.002 | 0.0657±0.001 | 0.0475±0.002 | 0.0856±0.003 | 0.0744±0.002 | 0.0485±0.001 | 0.2218±0.004 | 0.044±0.002  | 0.1086±0.002 | 0.061±0.001  |
| Coutaric acid       | 0.0177±0     | 0.0239±0.002 | 0.0086±0     | 0.0204±0.001   | 0.0275±0.001 | 0.0121±0     | 0.0069±0     | 0.0089±0.001 | 0.0094±0     | 0.0058±0     | 0.0603±0.002 | 0.0062±0     | 0.0061±0     | 0.003±0      |
| Myrcetin glycosides | 0.0634±0.002 | 0.0108±0     | 0.1729±0.011 | 0.1789±0.011   | 0.161±0.011  | 0.1652±0.017 | 0.0204±0.002 | 0.0625±0.006 | 0.1257±0.006 | 0.0367±0.006 | 0.1513±0.012 | 0.0984±0.004 | 0.1106±0.013 | 0.207±0.012  |
| Quer-galact         | 0.0187±0.003 | 0.0096±0.002 | 0.0036±0     | 0.0092±0       | 0.0044±0     | 0.0035±0.001 | 0.0114±0.003 | 0.0016±0     | 0.003±0      | 0.0008±0     | 0.0034±0.001 | 0.0035±0.001 | 0.0033±0     | 0.004±0      |
| Quer-glucoside      | 0.0264±0.001 | 0.0693±0.011 | 0.0224±0.001 | 0.0698±0.003   | 0.02±0       | 0.0207±0.004 | 0.0914±0.02  | 0.0135±0.001 | 0.0197±0.001 | 0.0061±0.001 | 0.0172±0.005 | 0.0197±0.003 | 0.0219±0.003 | 0.009±0.0004 |
| Quer-glucuronide    | 0±0          | 0.0375±0.007 | 0.0538±0.003 | 0.027±0.001    | 0.0789±0.002 | 0.046±0.007  | 0.0282±0.003 | 0.0143±0     | 0.0372±0.001 | 0.0157±0.001 | 0.0322±0.002 | 0.0348±0.002 | 0.0234±0.002 | 0±0          |
| Quer-rhamnose       | 0.0098±0.001 | 0.0193±0.003 | 0.0285±0.001 | 0.0335±0.001   | 0.0481±0.002 | 0.0369±0.004 | 0.02±0.002   | 0.0117±0.001 | 0.0194±0.001 | 0.0098±0.001 | 0.0066±0     | 0.0237±0.001 | 0.0122±0.001 | 0.024±0.001  |
| Delph-3-gluc        | 0.1292±0.001 | 0.0091±0     | 0.0632±0.002 | 0.2342±0.01    | 0.0877±0.005 | 0.0504±0.002 | 0.0117±0.001 | 0.0254±0.001 | 0.0345±0.011 | 0.0352±0.002 | 0.1124±0.006 | 0.0305±0.001 | 0.0251±0.001 | 0.338±0.014  |
| Cya-3-gluc          | 0.016±0      | 0.0864±0.004 | 0.0103±0     | 0.0847±0.003   | 0.0027±0     | 0.005±0      | 0.0448±0.007 | 0.0058±0     | 0.0033±0.001 | 0.009±0      | 0.0513±0.004 | 0.002±0      | 0.0018±0     | 0.089±0      |
| Pet-3-gluc          | 0.1451±0.001 | 0.0093±0     | 0.0789±0.002 | 0.2429±0.01    | 0.1113±0.005 | 0.0635±0.003 | 0.0126±0.001 | 0.0288±0.002 | 0.0406±0.013 | 0.0483±0.002 | 0.1726±0.007 | 0.0402±0.002 | 0.0269±0.001 | 0.35±0.014   |
| Peo-3-gluc          | 0.1585±0.002 | 0.8871±0.044 | 0.1013±0.002 | 0.7967±0.009   | 0.0617±0.003 | 0.054±0.003  | 0.3666±0.015 | 0.0693±0.001 | 0.0289±0.009 | 0.1103±0.005 | 0.2347±0.017 | 0.025±0.002  | 0.0159±0     | 0.844±0.013  |
| Mal-3-gluc          | 1.4128±0.012 | 0.1009±0.009 | 0.9453±0.006 | 1.4092±0.051   | 1.77±0.013   | 0.9652±0.036 | 0.0999±0.009 | 0.3881±0.024 | 0.3473±0.112 | 0.5815±0.007 | 1.2583±0.028 | 0.5761±0.028 | 0.2346±0.004 | 2.97±0.089   |
| Del-3-acetylgluc    | 0.0048±0     | 0±0          | 0.002±0      | 0.0045±0       | 0.0079±0     | 0.0021±0.001 | 0±0          | 0.0016±0     | 0.0018±0.001 | 0.0018±0     | 0.0126±0     | 0.0003±0     | 0.0016±0     | 0.024±0.001  |
| Cya-3-acetylgluc    | 0±0          | 0.0024±0     | 0.0021±0.001 | 0.0025±0       | 0.0078±0.001 | 0.0028±0     | 0.0013±0     | 0.0016±0     | 0.0009±0     | 0.0019±0     | 0.0035±0     | 0.0017±0     | 0.0001±0     | 0±0          |

|                          |              |              |              |              |              |              |              |              |              |              |              |              |              |             |
|--------------------------|--------------|--------------|--------------|--------------|--------------|--------------|--------------|--------------|--------------|--------------|--------------|--------------|--------------|-------------|
| <b>Pet-3-acetylglu</b>   | 0.0065±0     | 0.002±0.001  | 0.0025±0     | 0.0071±0     | 0.0123±0     | 0.002±0      | 0±0          | 0.0017±0     | 0.0021±0.001 | 0.0021±0     | 0.0258±0     | 0.0018±0     | 0.0024±0     | 0±0         |
| <b>Peo-3-acetylglu</b>   | 0.011±0      | 0±0          | 0±0          | 0±0          | 0±0          | 0±0          | 0±0          | 0±0          | 0±0          | 0±0          | 0±0          | 0±0          | 0±0          | 0±0         |
| <b>Mal-3-acetylglu</b>   | 0.1214±0.001 | 0.0089±0.006 | 0.0714±0.002 | 0.0689±0.002 | 0.4254±0.014 | 0.0848±0.003 | 0.0023±0     | 0.0402±0.002 | 0.0228±0.007 | 0.0485±0.001 | 0.2686±0.003 | 0.0534±0.003 | 0.0446±0.001 | 0.479±0.013 |
| <b>Delp-3-p-coumgluc</b> | 0.0324±0     | 0±0          | 0.0136±0     | 0.0518±0.002 | 0.0273±0     | 0.0164±0     | 0.0016±0     | 0.0063±0.001 | 0.0075±0.002 | 0.009±0      | 0.0613±0.001 | 0.0129±0.001 | 0.009±0      | 0.079±0.002 |
| <b>Cya-3-p-coumgluc</b>  | 0±0          | 0±0          | 0±0          | 0±0          | 0.0108±0     | 0±0          | 0.0028±0     | 0±0          | 0.001±0.001  | 0.0029±0     | 0.0267±0.002 | 0.0021±0     | 0.0007±0     | 0±0         |
| <b>Pet-3-p-coumgluc</b>  | 0.0625±0.001 | 0.0024±0     | 0.0375±0.001 | 0.0662±0.002 | 0.0682±0.001 | 0.0568±0.001 | 0.0007±0.001 | 0.0176±0.001 | 0.0182±0.006 | 0.0257±0     | 0.107±0.002  | 0.045±0.002  | 0.0207±0.001 | 0±0         |
| <b>Peo-3-p-coumgluc</b>  | 0.0624±0.001 | 0.0243±0.001 | 0.029±0.001  | 0.1505±0.003 | 0.0214±0     | 0.0249±0.001 | 0.0208±0     | 0.0236±0.001 | 0.0086±0.003 | 0.0366±0.002 | 0.1098±0.006 | 0.0132±0.001 | 0.0052±0     | 0.319±0.005 |
| <b>Mal-3-p-coumgluc</b>  | 0.541±0.001  | 0.0171±0.002 | 0.335±0.01   | 0.4896±0.028 | 0.8929±0.036 | 0.6246±0.011 | 0.0182±0.002 | 0.209±0.013  | 0.1214±0.037 | 0.2373±0.006 | 0.7362±0.01  | 0.4676±0.029 | 0.1621±0.002 | 1.187±0.02  |
| <b>Polymeric pigment</b> | 0.0583±0.006 | 0.0238±0.002 | 0.0765±0.009 | 0.1033±0.007 | 0.1434±0.021 | 0.1682±0.011 | 0.0424±0.004 | 0.0634±0.005 | 0.0328±0     | 0.061±0.002  | 0.1195±0.009 | 0.0678±0.006 | 0.0457±0     | 0.159±0.002 |
| <b>mDP</b>               | 24.63±1      | 21.13±2.23   | 22.5±1.04    | 15.64±1.04   | 20.77±0.16   | 19.71±0.23   | 22.95±0.26   | 22.99±1.08   | 18.25±0.37   | 18.14±0.16   | 17.55±0.7    | 22.02±1.13   | 23.44±0.26   | 26.5 ± 0.7  |
| <b>Tannin</b>            | 1.94±0.04    | 1.61±0.02    | 1.33±0.04    | 1.26±0.12    | 1.1±0.05     | 1.15±0.04    | 0.57±0.02    | 0.38±0.01    | 1.13±0.06    | 1.36±0.06    | 1.91±0.07    | 0.45±0.01    | 0.52±0.04    | 0.51 ± 0.06 |

mDP = mean degree of polymerization, calculated by the sum of all subunits (flavan-3-ol monomer and phloroglucinol adduct, in nmoles), divided by the sum of all flavan-3-ol monomers (in nmoles).
